# Supplementary material
Source: PubMed Central journal article supplement (PMC5395074)
Supplement: supp_WNL.0000000000003805_Table_e-1.pdf [file supp_WNL.0000000000003805_Table_e-1.pdf]

Table e-1. Correlations between select factors and hippocampi volume among middle-aged adults with childhood-onset T1D from the Pittsburgh Epidemiology of Diabetes Complications Study (N=79).

|                                          | Mean $\pm$ SD or N (%) | Hippocampi |           |
|------------------------------------------|------------------------|------------|-----------|
|                                          |                        | Rho        | p-value * |
| Physical activity (Kcal; Median (IQR)) † | 520 (420-2044)         | 0.395      | <0.001    |
| <b>Demographic Factors</b>               |                        |            |           |
| Female                                   | -0.133                 | -0.133     | 0.25      |
| Years of education                       | 15 $\pm$ 2             | 0.038      | 0.74      |
| Body mass index (kg/m <sup>2</sup> )     | 27 $\pm$ 5             | -0.155     | 0.18      |
| <b>Other risk factors</b>                |                        |            |           |
| Depressive symptoms ‡                    | 22 (28%)               | -0.121     | 0.29      |
| Diastolic blood pressure (mmHg)          | 65 $\pm$ 10            | -0.191     | 0.097     |
| History of high blood pressure           | 0.030                  | 0.030      | 0.80      |
| APOE 4 allele (24, 34, or 44)            | 25 (32%)               | 0.028      | 0.81      |
| <b>T1D-specific factors</b>              |                        |            |           |
| T1D duration (years)                     | 41.3 $\pm$ 6.4         | -0.002     | 0.99      |
| Age at T1D diagnosis (years)             | 8.4 $\pm$ 4.3          | -0.239     | 0.034     |
| Glucose disposal rate (mg/kg/min) §      | 7.2 $\pm$ 2.5          | 0.113      | 0.33      |
| Serum glucose (mg/dL)                    | 176.9 $\pm$ 84.8       | -0.046     | 0.69      |
| HbA1c months (AU)                        | 1157.0 $\pm$ 424.1     | -0.018     | 0.88      |
| Proliferative retinopathy                | 42 (53%)               | 0.250      | 0.028     |
| Distal symmetric polyneuropathy (n=72)   | 41 (57%)               | -0.062     | 0.61      |
| Coronary artery disease                  | 10 (13%)               | -0.069     | 0.55      |

|                                        |             |        |      |
|----------------------------------------|-------------|--------|------|
| Glomerular filtration rate (n=71)    ¶ | 79.9 ± 26.8 | -0.046 | 0.71 |
|----------------------------------------|-------------|--------|------|

Statistical significance set at 0.003 (per Sidak correction, 0.05/17)

\* Rho and p-values after partialling out age and intracranial volume with the exception of T1D duration and age at diagnosis; these factors are highly collinear with age

† Rho and p-value based on Log10 transformed physical activity

‡ Score  $\geq 10$  on Beck Depression Inventory

§ Estimated glucose disposal rate, a measure of insulin sensitivity

|| Assessed in 2004-2006

¶ Estimated per Chronic Kidney Disease Epidemiology Collaboration (CKD-EPI) equation
